# Supplementary material for: Anti-adipogenic effects of KD025 (SLx-2119), a ROCK2-specific inhibitor, in 3T3-L1 cells
Source: PubMed Central journal article supplement (PMC5802830; doi:10.1038/s41598-018-20821-3), 2018-02-06

## SUPPLEMENTARY DATA

**Anti-adipogenic effects of KD025 (SLx-2119), a ROCK2-specific inhibitor, in 3T3-L1 cells.**

**Duy Trong Vien Diep<sup>1\*</sup>, Kyungki Hong<sup>1\*</sup>, Triyeng Khun<sup>1\*</sup>, Mei Zheng<sup>1</sup>, Asad ul-Haq<sup>1</sup>, Hee-Sook Jun<sup>1,3,4</sup>, Young-Bum Kim<sup>2,3†</sup>, and Kwang-Hoon Chun<sup>1†</sup>**

*<sup>1</sup>Gachon Institute of Pharmaceutical Sciences, College of Pharmacy, Gachon University, Incheon 21936, Republic of Korea*

*<sup>2</sup>Division of Endocrinology, Diabetes and Metabolism, Beth Israel Deaconess Medical Center and Harvard Medical School, Boston, Massachusetts, United States*

*<sup>3</sup>Lee Gil Ya Cancer and Diabetes Institute, Gachon University, Incheon 21999, Republic of Korea*

*<sup>4</sup>Gachon Medical Research Institute, Gil Hospital, Incheon 21565, Republic of Korea*

†Correspondence to:

**Kwang-Hoon Chun, College of Pharmacy, Gachon University, Incheon 21936, Republic of Korea**

**Tel.: +82-32-820-4951**

**E-mail: khchun@gachon.ac.kr**

**Young-Bum Kim, 330 Brookline Ave, CLS-745, Boston, MA 02215, USA**

**Tel.: +1-617-735-3216, Fax: +1-617-735-3323**

**E-mail: ykim2@bidmc.harvard.edu**

**\*The authors contributed equally**

# Supplemental Figures

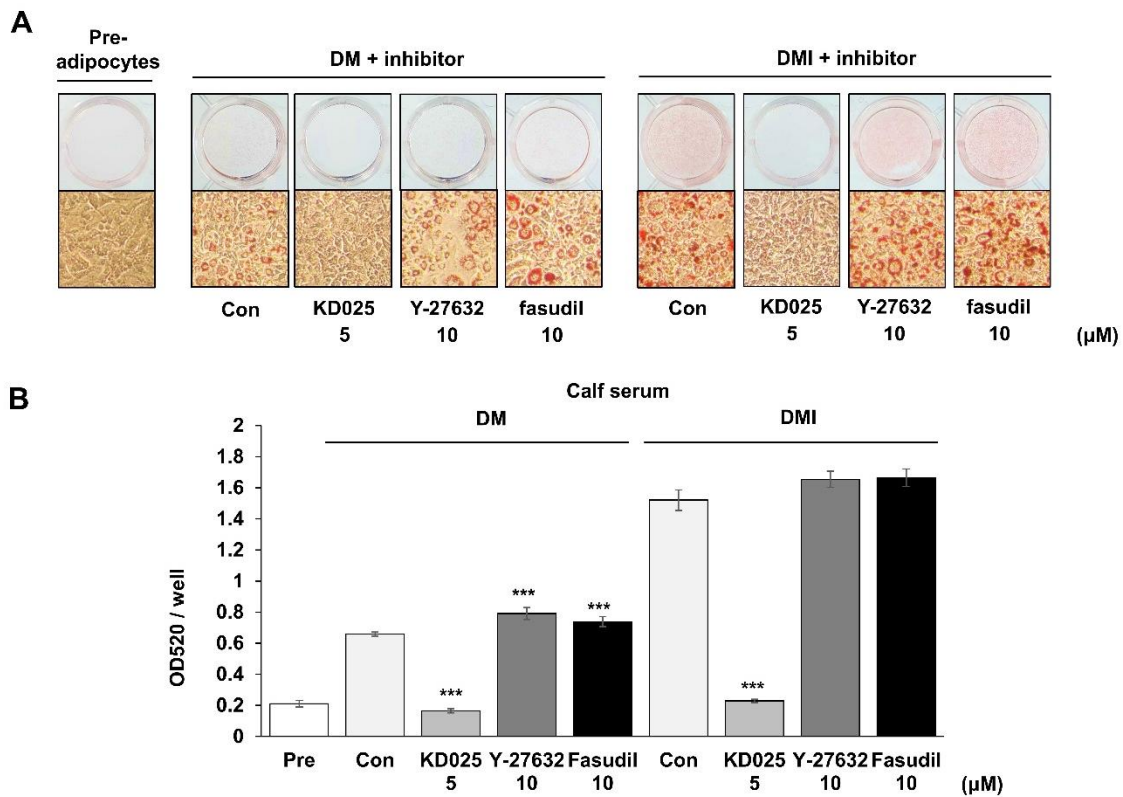

**Supplementary Figure S1. Comparison of the effects of ROCK inhibitors during 3T3-L1 adipogenesis.** (A) 3T3-L1 pre-adipocytes were cultured in 10% calf serum containing culture media. After 2 days incubation post-confluence, they were differentiated by incubation in DMI with KD025, Y-27632, or fasudil, as indicated, and stained with Oil Red O on day 8. (B) Lipid accumulation was assessed by measuring absorbance at 520 nm of Oil Red O. Data is expressed as means  $\pm$  S.E. based on triplicate experiments. \*,  $p < 0.05$ ; \*\*,  $p < 0.01$ ; \*\*\*,  $p < 0.001$  vs. DM control.

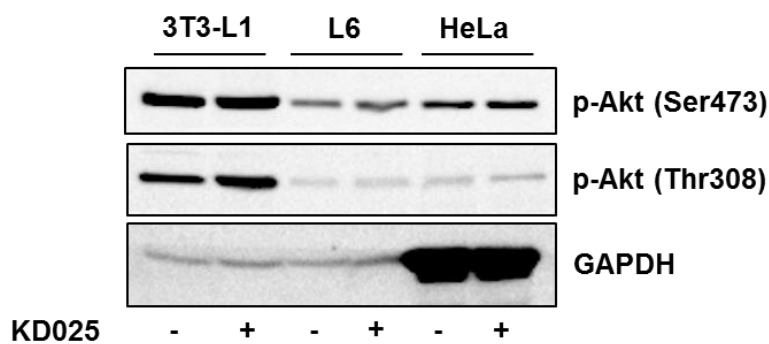

**Supplementary Figure S2. Comparison of the effects of ROCK inhibitors in normal growth condition.** Sub-confluent 3T3-L1, L6, or HeLa cells were treated with 5  $\mu$ M of KD025 (in 10% NBCS or FBS/DMEM) for 1 day. Cell lysates were obtained and subjected to SDS-PAGE for immunoblot analysis using anti-phospho-IRS-1 (Tyr608) and anti-phospho-Akt (Ser473 and Thr308) antibodies. GAPDH was used as a loading control.

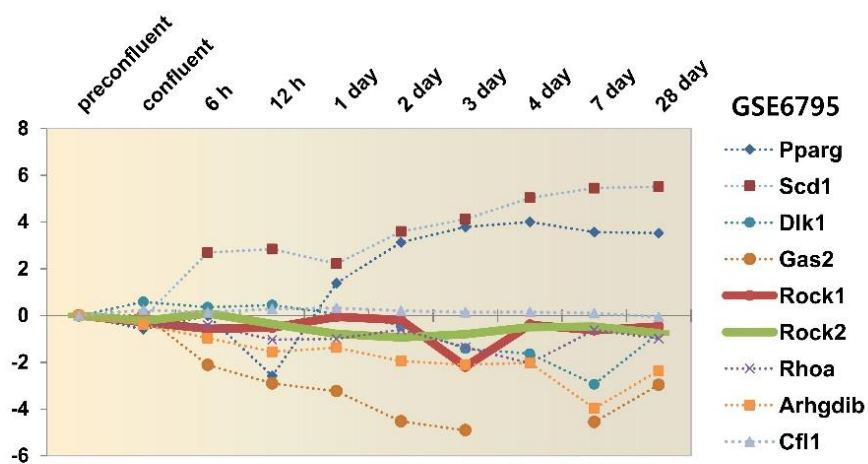

**Supplementary Figure S3. ROCK mRNA level during adipogenesis.** Gene expression level was analyzed during adipogenesis of 3T3-L1 using data (ID : GSE6795) from Gene Expression Omnibus database (<https://www.ncbi.nlm.nih.gov/geo/>). Up- or down-regulated genes are displayed for comparison. *Cfl1*, cofilin gene, was consistent in the mRNA level through the differentiation.

# Raw Images used in article

## Figure 5

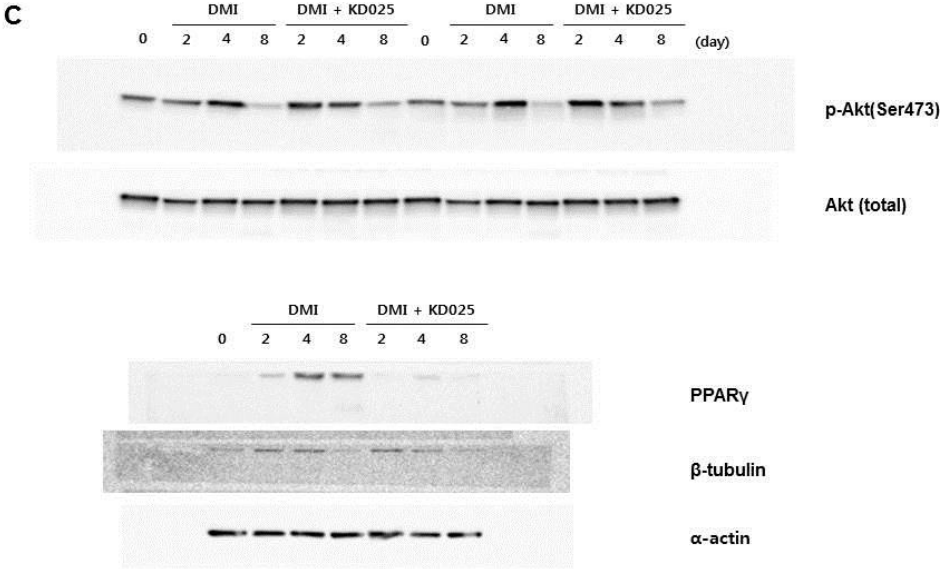

**Figure 6**

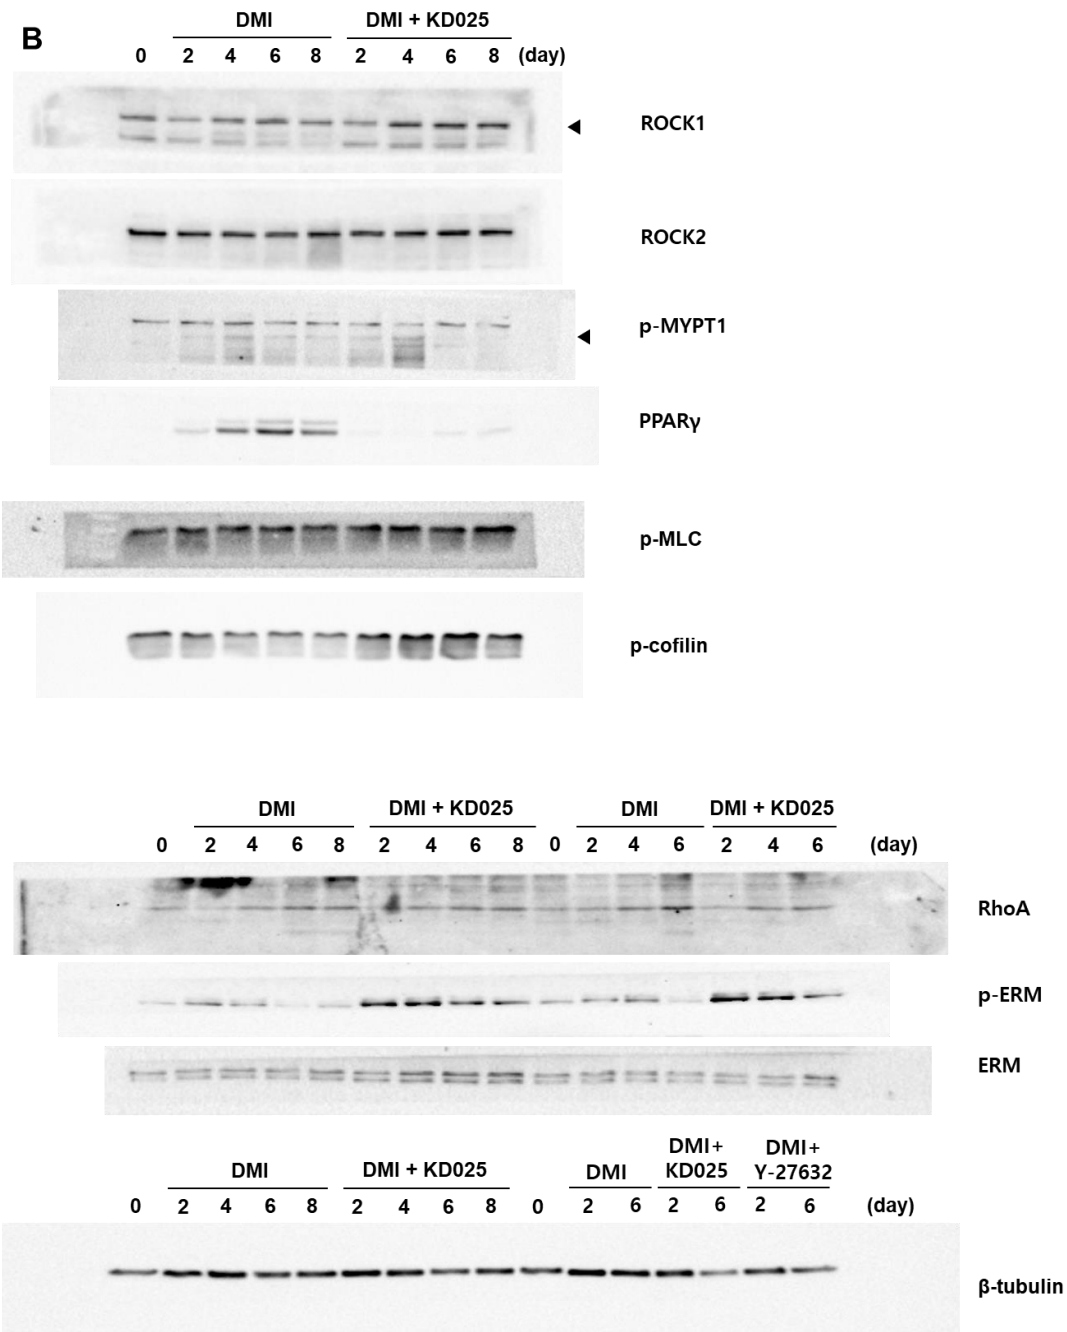

**D**

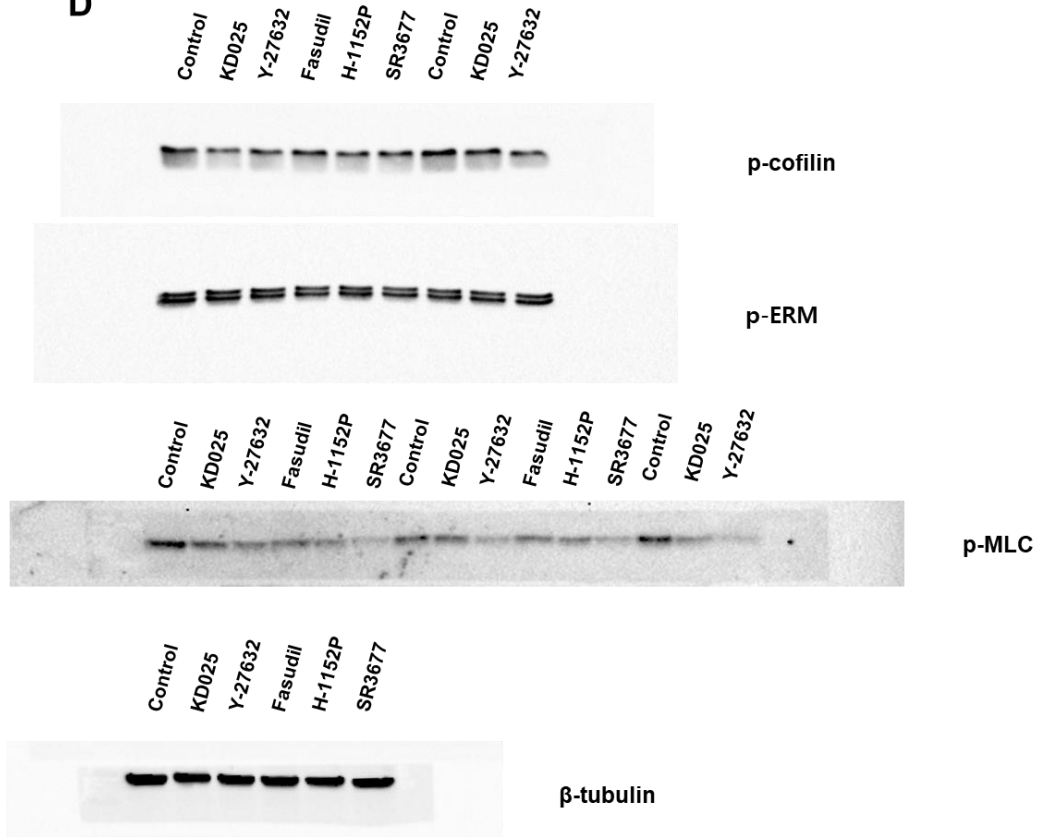

# Figure 7

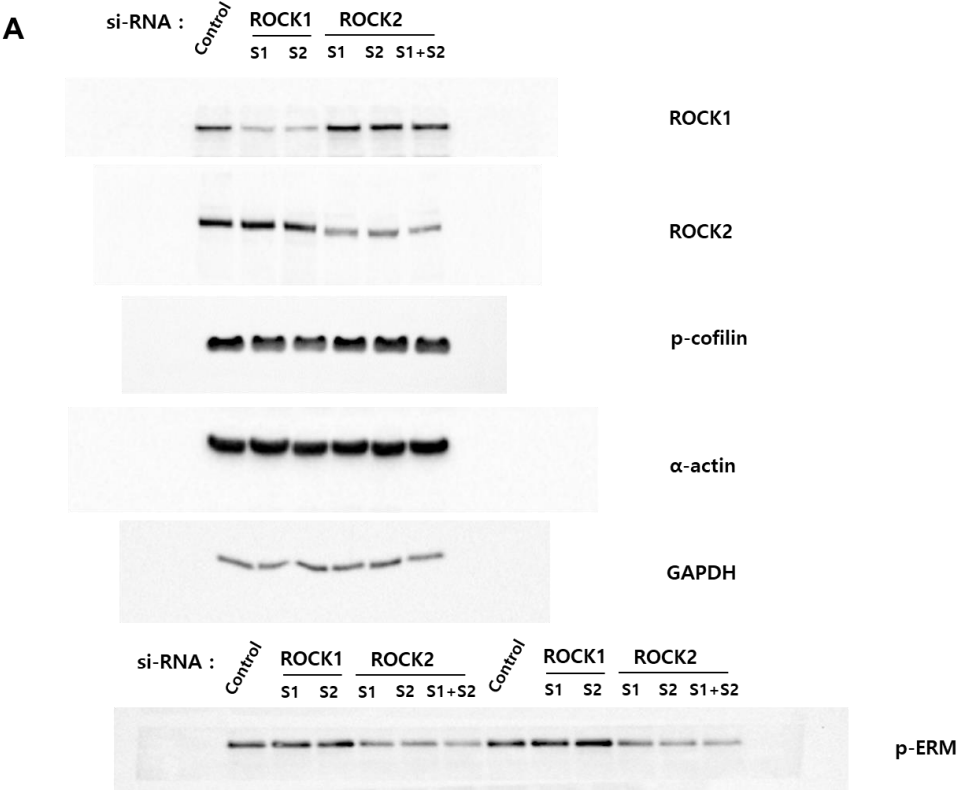

Supplement: 41598_2018_20821_MOESM1_ESM.pdf [file 41598_2018_20821_MOESM1_ESM.pdf]
